# Supplementary material
Source: HighWire-hosted journal article supplement (https://www.cmajopen.ca/content/suppl/2020/02/06/8.1.E75)
Supplement: 2019-0147-original-submission.pdf [file 2019-0147-original-submission.pdf]

1  
2  
3 **Title:**

4 **Improving compliance and emergency access to ASA and nitroglycerin: development**  
5 **and validation of the SMHeartCard®**  
6  
7

8  
9 **Authors:** Tyson Le MSc (1), D. Ian Paterson MD (2), Neal Davies PhD (1), and John R. Mackey  
10 MD (2)  
11  
12

13  
14 **Affiliations:** University of Alberta, Faculties of (1) Pharmacy and Pharmaceutical Sciences and  
15 (2) Medicine and Dentistry, Edmonton, AB, Canada  
16  
17

18 **Corresponding Author: John R. Mackey**

19 Cross Cancer Institute  
20 11560 University Ave.  
21 Edmonton, AB, Canada  
22 T6G 1Z2  
23 Phone: 780-432-8221  
24 Email: [john.mackey@albertahealthservices.ca](mailto:john.mackey@albertahealthservices.ca)  
25  
26

27 **Running Title:** SMHeartCard® validation  
28  
29

30 **Keywords:** Nitroglycerin; acetylsalicylic acid; SMHeartCard®; dissolution testing  
31  
32

33 **Funding Sources:** Product prototypes and supplies for this study were provided by  
34 SMHeartCard® Inc.  
35  
36

37  
38 **Authors' Contributions:** JRM led the project, designed and conducted some of the  
39 experiments, and drafted the manuscript. ND designed and interpreted the performance testing  
40 experiments. TL performed the laboratory studies, collected and analyzed the data. DIP critically  
41 reviewed the data and the manuscript. All authors read and approved the final manuscript.  
42  
43  
44

45  
46 **Acknowledgments:** We thank James Stewart for SMHeartCard® design input, as well as Carol  
47 Paul and Suzette Cabral-Mackey for logistical support. We thank Dr. C. Horsman for feedback  
48 on product design. We thank Edith Pituskin for advice on knowledge translation. We thank  
49 Darrin Berlin, Claudia Johnson and Murtasa Hassanalli for advice on the needs of Canadian  
50 pharmacists. We thank Deanna Hockley for publication coordination.  
51  
52  
53

54  
55 **Conflicts of interest:** JRM holds shares in SMHeartCard® Inc.  
56  
57

1  
2  
3  
4  
5  
6  
7  
8  
9  
10  
11  
12  
13  
14  
15  
16  
17  
18  
19  
20  
21  
22  
23  
24  
25  
26  
27  
28  
29  
30  
31  
32  
33  
34  
35  
36  
37  
38  
39  
40  
41  
42  
43  
44  
45  
46  
47  
48  
49  
50  
51  
52  
53  
54  
55  
56  
57  
58  
59  
60

**Availability of data and material:** Copies of the data are available from the authors on request and with the permission of SMHeartCard Inc.

**Manuscript text word count:** 2477 (max 2500)

Confidential

**ABSTRACT (max 250 word): 236**

**Background:** Guidelines for coronary artery disease (CAD) recommend carrying and immediately using acetylsalicylic acid (ASA) and sublingual nitroglycerin at the onset of chest pain. However, compliance with these recommendations is poor. A recent Canadian survey of people with established CAD found only 20% of patients carried nitroglycerin and none carried ASA. We designed and tested a compact on-person carrying system for these medications.

**Methods:** We designed an airtight, lightproof and chemically inert container designed to carry four ASA 81mg tablets and three NitroStat® 0.3mg sublingual nitroglycerin tablets. After establishing the temperatures ranges in wallets and pockets, we performance tested (time course of nitroglycerin dissolution and release) stored Nitrostat® tablets across a range of relevant temperatures and a variety of pill enclosure systems.

**Results:** Nitroglycerin tablets were stable at temperatures ranging from -20°C to 60°C for one week as shown by microcalorimeter thermal conduction studies and dissolution and release testing. In testing up to 24 weeks, Nitrostat® 0.3mg completely enclosed in polytetrafluoroethylene (PTFE) performed similarly to those stored in the manufacturer's packaging across a wide range of temperatures relevant to on-person carriage. Real-world on-person testing after 24 weeks confirmed these results. Non-PTFE enclosures performed poorly.

**Interpretation:** The PTFE enclosure system maintains long-term performance of Nitrostat® 0.3mg tablets under laboratory and real-world conditions. This ASA and PTFE-enclosed nitroglycerin tablet storage system is now commercially available as SMHeartCard® to improve compliance and provide immediate access to emergency cardiac medications.

**TEXT: WORDS 2477 (MAXIMUM 2500)****INTRODUCTION**

Acetylsalicylic acid (ASA) is a potent inhibitor of platelet aggregation and clotting. Nitroglycerin is a vasodilatory drug used to alleviate cardiac chest pain due to inadequate blood supply to the myocardium. The American Heart Association Guidelines (1) recommend patients with coronary artery disease (CAD) carry and use both ASA and nitroglycerin at the onset of chest pain. Specifically, patients with known or suspected CAD who develop chest pain should immediately chew and swallow ASA at doses from 162mg to 325 mg, and take an initial dose of a nitroglycerin preparation (1). If pain is not relieved, emergency medical services should be activated.

Early administration of ASA and nitroglycerin is beneficial in acute coronary syndromes. Immediate ASA lowers mortality from myocardial infarction (MI), with a clear association between the onset of MI symptoms and time to ASA (2). In observational studies, pre-hospital administration of sublingual nitroglycerin significantly reduces chest pain (3) and is safe to use, with the only noted adverse effect being non-clinically significant hypotension in 0.7 – 3.2 % of patients (3, 4). Pre-hospital administration of nitroglycerin by emergency response teams is associated with improved survival (5) and a Cochrane meta-analysis of in-hospital nitrates in acute coronary syndromes found an initial improvement in survival when administered within the first 24 hours (6).

Storing ASA requires only a low humidity environment. In contrast, nitroglycerin has physical properties complicating storage. In its pure form, nitroglycerin is volatile, reacts with oxygen, and degrades with light. Furthermore, nitroglycerin adsorbs to most plastics and desiccants used to store and distribute tablets. While nitroglycerin sprays are the primary way to carry and administer nitroglycerin in Canada, these are inconvenient to carry, and freeze at low temperatures. In a prospective Canadian case series of 38 consecutive patients with CAD attending a primary care clinic, only 7 of 38 (18%) of patients prescribed nitroglycerin sprays carried the medication. Among men, the rate was 12% (2 of 17). The inconvenience of carrying nitroglycerin spray was the most frequent explanation for lack of compliance (7).

To improve compliance and provide immediate access to ASA and nitroglycerin, we designed a small, convenient pill holder to fit in wallets, pockets, and purses. We included clear instructions on the pill holder as people having chest pain may forget how to use their medications. In this

1  
2  
3 study, we evaluated this case with a series of nitroglycerin enclosures under a range of  
4 laboratory conditions simulating on-person carriage, as well as a full 24-week “real-world”  
5 evaluation of on-person carriage. We hypothesized that Nitrostat® 0.3mg tablets stored within  
6 the emergency medication holder would not degrade significantly faster than those stored in  
7 original borosilicate glass packaging at room temperature.  
8  
9  
10

## 11 12 13 14 **METHODS**

### 15 ***Materials:***

16 0.3 mg and 0.6mg Nitrostat® tablets (Pfizer Canada Inc.) were purchased from McKesson  
17 Canada (Saint-Laurent, MTL, Canada). Durapore® membrane filter, 0.45 µm pore size  
18 hydrophobic polyvinylidene difluoride (PVDF), 13 mm membrane were obtained from Millipore  
19 Sigma (Etobicoke, ON, Canada). High-performance liquid chromatography (HPLC) grade  
20 methanol and octanol was purchased from Fischer Scientific (Ottawa, ON, Canada). Water  
21 used for release tests and HPLC analysis was purified by Elgastat Maxima UF and an Elgastat  
22 Option 3B water purifier by ELGA Laboratories Ltd. (Mississauga, ON, Canada).  
23  
24  
25  
26  
27  
28  
29

### 30 ***Product Design:***

31 We designed a product that: i) was small and thin enough to fit in a wallet, ii) cradled a  
32 chemically inert insert to hold three nitroglycerin tablets, iii) permitted a cap system to  
33 completely enclose nitroglycerin in a chemically inert chamber without exposure to air, moisture  
34 or light, and iv) had clear directions for medication use. The disassembled system is shown  
35 schematically in Figure 1A, showing: 1) the nitroglycerin cap; 2) the nitroglycerin cap liner; 3)  
36 three nitroglycerin tablets; 4) the chemically inert nitroglycerin insert with three individual wells to  
37 hold individual doses of nitroglycerin, minimizing the atmospheric exposure and physical  
38 mobility of the nitroglycerin tablets; 5) the base; 6) grooves to place tamper-resistant tape; 7)  
39 instructions for medication use on the card; 8) the nitroglycerin insert holder; 9) the ASA well;  
40 10) ASA tablets; 11) the ASA cap liner; 12) the ASA cap; and 13) the cap bridge forcing the  
41 proper orientation of the NTG and ASA cap. The back surface of the card also carries a label  
42 with instructions for use and expiration date. Figure 1B demonstrates the assembled product.  
43  
44  
45  
46  
47  
48  
49  
50  
51

### 52 ***Temperature and Humidity Excursions with On-Body Carriage:***

53 Minimum and maximum pocket temperature was measured with a ThermPro -TP50 Digital LCD  
54 Indoor Thermometer Hygrometer Humidity Meter. Four individuals carried this instrument in shirt  
55  
56  
57

1  
2  
3 or pants pockets continuously over 24 hours periods in both summer and winter conditions, with  
4 humidity and temperature readings taken every 10 seconds.  
5  
6  
7

### 8 **Heat Flow (Calorimeter Experiments):**

9 A thermal activity monitor III (TAM III; TA instruments, USA) measured 0.3 mg Nitrostat®  
10 tablets' heat flow to identify thermal chemical degradation. Six tablets were added into a  
11 stainless steel microcalorimeter ampoule and experiments were performed at various conditions  
12 (45°C with nitrogen, and 45°C, 50°C, and 60°C in atmospheric oxygen), for one week.  
13  
14  
15  
16

### 17 **Storage Conditions:**

18 We sought to identify the appropriate materials in which to enclose nitroglycerin tablets, and to  
19 establish whether N<sub>2</sub> gas packaging would improve nitroglycerin tablet stability. As a control for  
20 all packaging experiments, Nitrostat® tablets were stored at room temperature (approximately  
21 22°C), in their original Pfizer borosilicate glass screw top vial with a plastic lined metal screw  
22 cap. The case was tested with either of two inserts made from polytetrafluoroethylene (PTFE; a  
23 synthetic fluoropolymer), or borosilicate glass. Cap liners were either PTFE coated or  
24 polyethylene (PE). Tablets were also stored with and without N<sub>2</sub> gas to replace atmospheric  
25 oxygen. Laboratory temperatures tested were 4°C, room temperature (RT), and 35°C. Tablets  
26 were stored for 1, 2, 4, 8, 12 and 24 weeks before being subjected to release tests to evaluate  
27 their performance. Additional studies were performed at -20°C at 4 weeks. After demonstrating  
28 the stability of the SMHeartCard® PTFE insert and PTFE cap liner system at 4°C, RT and 35°C,  
29 an independent "real-world" evaluation was performed. In these experiments 0.3mg and 0.6mg  
30 Nitrostat® tablets were kept either in their original manufacturing packaging at RT (control), or  
31 within a SMHeartCard® case containing PTFE inserts and cap, and kept on-person within  
32 wallets, pockets, backpacks, and purses for 24 weeks.  
33  
34  
35  
36  
37  
38  
39  
40  
41  
42  
43

### 44 **In vitro Release Test:**

45 *In vitro* release studies were done using Franz glass diffusion cells to determine the cumulative  
46 percentage drug release. Receptor media was double distilled water filled between 12 to 13 mL  
47 in the receptor chamber of each cell. Receptor chambers were maintained at 37.4 ± 0.5 °C  
48 using a circulating water bath (Haake D8, Germany). A magnetic stirring bar was used to stir the  
49 receptor media in each diffusion cell at 600 rpm (IKA, USA). A 0.45 µm synthetic hydrophobic  
50 (PVDF) membrane was briefly soaked in octanol to create a partition replicating a mucosal  
51 membrane. The membrane was assembled between the donor and receptor compartments of  
52  
53  
54  
55  
56  
57

1  
2  
3 the Franz cell. A Nitrostat® pill was added on top of the membrane and 1 mL of double distilled  
4 water was added to dissolve the sample. 100 µL of samples were collected through a sampling  
5 port with a needle at 2, 5, 10, 20, 30, and 60 minute time points. The same volume withdrawn  
6 was replaced with double distilled water. Samples were analyzed using HPLC as described  
7 below.  
8  
9  
10

### 11 12 **Analytical Method:**

13  
14 HPLC methods were adapted from the United States Pharmacopoeia (USP) standard with slight  
15 modifications. Analysis was carried out using a Shimadzu system equipped with two LC-10AD  
16 VP pumps, SIL-HTC autosampler, and a SPD-10AV UV-Vis detector. Chromatographic  
17 separation was achieved using a Genesis C18 column (100 x 3.0 mm, 4 µm), at room  
18 temperature. An isocratic mobile phase of methanol in water 45:55 with a flow rate of 0.75  
19 mL/min. Samples were injected at 50 µL with UV detector's wavelength set at 210 nm.  
20  
21  
22  
23

### 24 25 **Statistical analysis of release curves:**

26  
27 DDSolver, a Microsoft Excel add-in, was used to analyze the release profiles of Nitrostat®  
28 tablets. As recommended by the FDA (8), F2 values were calculated to compare the mean  
29 cumulative percent release of nitroglycerin from the original borosilicate glass enclosed  
30 packaging (control) at RT, and the different storage conditions. F2 is a similarity factor used to  
31 measure the closeness between two release profiles. F2 values above 50 indicate that two  
32 release profiles are statistically similar and acceptable to the FDA as showing clinically  
33 acceptable performance.  
34  
35  
36  
37  
38

## 39 40 **RESULTS**

### 41 ***Pocket temperature ranges for nitroglycerin storage.***

42  
43 In order to determine on-body temperature ranges typical for Canadians, the pocket  
44 temperature extremes of four individuals was monitored using a thermometer hygrometer  
45 humidity meter. On-person carriage of this instrument in shirt and pant pockets during both  
46 winter and summer conditions demonstrated temperatures ranging from 17.2°C to 32.4°C  
47 (Figure 2). We consequently tested various enclosure systems at long-term temperatures  
48 ranging from 4°C to 35°C, representing real world nitroglycerin carriage conditions, and short-  
49 term temperature extremes.  
50  
51  
52  
53  
54

### 55 ***Nitroglycerin tablets are chemically stable at temperatures between 45°C to 60°C.***

1  
2  
3 Due to the probability of nitroglycerin tablets stored within the SMHeartCard® being subjected to  
4 short-term, high temperatures, such as those experienced in a hot vehicle, we evaluated the  
5 thermal chemical degradation of 0.3mg Nitrostat® tablets at elevated temperatures. We  
6 performed a series of heat flow experiments in which six 0.3mg Nitrostat® tablets were placed  
7 inside a stainless steel microcalorimeter ampoule and monitored with a TAM III thermal activity  
8 monitor for one week. By this method, we measured the heat flow of the nitroglycerin tablets at  
9 45°C with or without N<sub>2</sub> packing, 50°C, and 60°C. Nitroglycerin tablets (6 at each condition)  
10 were found to be chemically stable for one week at 45°C, 50°C, 60°C, and N<sub>2</sub> packaging did not  
11 improve their stability (Figure 3). We also subjected tablets stored under these conditions to *in*  
12 *vitro* release tests to determine their cumulative nitroglycerin release profile. One week  
13 exposure to high temperatures without N<sub>2</sub> packaging did not trigger nitroglycerin degradation or  
14 impairment (Figure 4). Thus, short-term exposure of Nitrostat® tablets to high temperatures  
15 does not appear to significantly affect drug stability.  
16  
17  
18  
19  
20  
21  
22  
23  
24

25 ***Nitroglycerine tablets stored in PTFE enclosed conditions perform similarly to those***  
26 ***stored in original packaging in nitroglycerin release tests.***  
27

28 To assess the performance of 0.3mg Nitrostat® tablets enclosed in a variety of materials, we  
29 performed *in vitro* nitroglycerin release tests using Franz glass diffusion cells. As a control for  
30 these experiments, nitroglycerine tablets were stored in their original borosilicate glass packing  
31 at room temperature (RT). F<sub>2</sub> values were also calculated to compare the similarity in  
32 nitroglycerin release profiles between controls and tablets stored under the test conditions  
33 described for all experiments (Table 1). 0.3mg Nitrostat® tablets stored in PTFE enclosed  
34 conditions (PTFE insert, PTFE cap) were found to perform similarly to controls across a range  
35 of temperatures (-20°C, 4°C, RT, and 35°C), indicating that the storage system with a PTFE  
36 insert and PTFE-lined cap provided the best storage solution for these tablets (Figure 5).  
37 Importantly, 0.3mg Nitrostat® tablets storage with a PTFE insert and cap under real-world  
38 conditions for 24 weeks again had release profile that was similar to the borosilicate glass  
39 control, indicating that these tablets maintained their stability during on-person SMHeartCard®  
40 carriage (Figure 6). Altogether, these results demonstrate that 0.3mg Nitrostat® tablets are  
41 stable across a range of temperatures (-20°C to 35°C) when stored in PTFE enclosed  
42 conditions for up to 24 weeks.  
43  
44  
45  
46  
47  
48  
49  
50  
51  
52  
53

54 Storage conditions that did not perform similarly to the control included the case with a  
55 borosilicate glass insert and PTFE cap, a PTFE insert and PE cap, the case with nitrogen gas  
56  
57



1  
2  
3 packing (PTFE insert, PTFE cap and glass insert, PTFE cap) at 35°C, and 0.6mg Nitrostat®  
4 tablets (Table 1).  
5  
6  
7

## 8 **INTERPRETATION**

9  
10 Despite the importance of immediate access to ASA and nitroglycerin during MI, a recent  
11 Canadian survey showed only 20% of patients with established CAD could produce nitroglycerin  
12 when directly questioned, and none carried ASA (7). Furthermore, an audit of a Canadian  
13 hospital found that among patients presenting with acute coronary syndromes (myocardial  
14 infarction and unstable angina), the median time to ASA and nitroglycerin administration was  
15 more than 90 minutes after arrival at the emergency room (9). Unfortunately, approximately  
16 thirty percent of people with MI do not survive long enough to reach medical care (10), and this  
17 is more frequent in people who live and work in geographically isolated areas. To increase the  
18 convenience and improve compliance with carrying and proper use of these medications, we  
19 designed a credit card sized holder to carry nitroglycerin tablets and ASA with clear patient  
20 instructions.  
21  
22  
23  
24  
25  
26  
27

28  
29 We evaluated a number of configurations and components to optimize the stability of  
30 nitroglycerin tablets for long-term, on-person carriage. Among the various experimental  
31 permutations, we found that by tightly enclosing Nitrostat® 0.3 mg tablets in a PTFE insert, and  
32 covering the insert with a PTFE coated cap liner, we maintained long-term performance  
33 properties of Nitrostat® 0.3 mg tablets for 24 weeks under both laboratory and real-world  
34 conditions. Nitrogen packing provided no benefit in stabilizing Nitrostat®. The complete PTFE  
35 enclosure performed as well as storage in standard borosilicate glass vials. This product is  
36 patented (CA180764S) and trademarked as SMHeartCard®, and now marketed in Canada  
37 ([www.smheartcard.ca](http://www.smheartcard.ca)) for on-person carriage of ASA and 0.3 mg Nitrostat® tablets.  
38  
39  
40  
41  
42  
43

44  
45 By demonstrating that the SMHeartCard® system is an effective storage system to provide  
46 immediate access to emergency cardiac medications for a 24 week period, the product has the  
47 potential to reduce MI mortality by improving access and timeliness of treatment. The results are  
48 of potential importance to three groups. The first group is the population with established  
49 coronary artery disease (CAD) whose compliance with carrying ASA and standard nitroglycerin  
50 spray formulations is very poor (7). The second group comprises individuals with risk factors for  
51 MI but without a previous cardiac ischemic event. Canadians have a high prevalence of risk  
52 factors for coronary artery disease, including hypertension, tobacco smoking, diabetes,  
53  
54  
55  
56  
57

1  
2  
3 hyperlipidemia, obesity, sedentary lifestyle, and age > 50 years (11). Treatment of modifiable  
4 risk factors reduces, but does not eliminate risk of MI. Additionally, while people with these kinds  
5 of cardiovascular risk factors are sometimes recommended to take daily low dose ASA as  
6 prophylaxis, new evidence suggests that for older individuals, the risks of daily ASA use  
7 outweighs the benefits (12). Additionally, first responders may wish to carry SMHeartCard® and  
8 permit first-aid trained individuals to provide immediate treatment to those with heart attack  
9 symptoms.  
10  
11  
12  
13  
14

15  
16 We acknowledge we have not tested SMHeartCard® for periods exceeding the manufacturer's  
17 recommendations of 6 month stability. Formal demonstration that on-person compliance with  
18 SMHeartCard® exceeds that of nitroglycerin sublingual spray preparations is planned in an  
19 prospective clinical trial.  
20  
21  
22

23  
24 In summary, we designed and validated a new medication storage system, now marketed as  
25 SMHeartCard®, to permit on-person carriage and immediate treatment of symptoms of MI and  
26 angina. Given that time to initial treatment is an important determinant of survival in MI, and that  
27 a substantial proportion of MIs are fatal before the patient reaches hospital, this system has the  
28 potential to improve outcomes in people with established and previously undiagnosed coronary  
29 artery disease.  
30  
31  
32  
33  
34  
35  
36  
37  
38  
39  
40  
41  
42  
43  
44  
45  
46  
47  
48  
49  
50  
51  
52  
53  
54  
55  
56  
57  
58  
59  
60

## REFERENCES

1. O'Gara PT, Kushner FG, Ascheim DD, Casey DE, Jr., Chung MK, de Lemos JA, et al. 2013 ACCF/AHA guideline for the management of ST-elevation myocardial infarction: a report of the American College of Cardiology Foundation/American Heart Association Task Force on Practice Guidelines. *J Am Coll Cardiol*. 2013;61(4):e78-e140.
2. Randomised trial of intravenous streptokinase, oral aspirin, both, or neither among 17,187 cases of suspected acute myocardial infarction: ISIS-2. ISIS-2 (Second International Study of Infarct Survival) Collaborative Group. *Lancet*. 1988;2(8607):349-60.
3. Clemency BM, Thompson JJ, Tundo GN, Lindstrom HA. Prehospital high-dose sublingual nitroglycerin rarely causes hypotension. *Prehosp Disaster Med*. 2013;28(5):477-81.
4. Engelberg S, Singer AJ, Moldashel J, Sciammarella J, Thode HC, Henry M. Effects of prehospital nitroglycerin on hemodynamics and chest pain intensity. *Prehosp Emerg Care*. 2000;4(4):290-3.
5. Strandmark R, Herlitz J, Axelsson C, Claesson A, Bremer A, Karlsson T, et al. Determinants of pre-hospital pharmacological intervention and its association with outcome in acute myocardial infarction. *Scand J Trauma Resusc Emerg Med*. 2015;23:105.
6. Perez MI, Musini VM, Wright JM. Effect of early treatment with anti-hypertensive drugs on short and long-term mortality in patients with an acute cardiovascular event. *Cochrane Database Syst Rev*. 2009(4):CD006743.
7. Horsman C, Frederick T. Poor Compliance With Carrying Nitroglycerin and Aspirin in Patients With Coronary Artery Disease. *Can J Cardiol*. 2018;34(7):945 e1.
8. Shah RB, Khan MA. The Science and Regulatory Perspectives of Emerging Controlled Release Dosage Forms. In: Wen H, Park K, editors. *Oral Controlled Release Formulation Design and Drug Delivery: Theory to Practice*. John Wiley & Sons, Inc.; 2010. p. 337-49.
9. Dufresne F, Blouin D, Xue X, Afilalo M. Underutilization of acetylsalicylic acid for acute coronary syndromes in the emergency department. *CJEM*. 2004;6(5):333-6.
10. Dudas K, Lappas G, Stewart S, Rosengren A. Trends in out-of-hospital deaths due to coronary heart disease in Sweden (1991 to 2006). *Circulation*. 2011;123(1):46-52.
11. Tanuseputro P, Manuel DG, Leung M, Nguyen K, Johansen H, Canadian Cardiovascular Outcomes Research T. Risk factors for cardiovascular disease in Canada. *Can J Cardiol*. 2003;19(11):1249-59.
12. McNeil JJ, Woods RL, Nelson MR, Reid CM, Kirpach B, Wolfe R, et al. Effect of Aspirin on Disability-free Survival in the Healthy Elderly. *N Engl J Med*. 2018;379(16):1499-508.

## TABLES

**Table 1. F2 values comparing the release profile of Nitrostat® tablets stored in original borosilicate glass packaging at room temperature to that of Nitrostat® tablets stored within the cardiac medication holder at various temperatures and test conditions.**

|                                                       | Experimental storage condition                      | Week 1 |      | Week 2 |      | Week 4 |      | Week 8 |      | Week 12 |      | Week 24 |      |
|-------------------------------------------------------|-----------------------------------------------------|--------|------|--------|------|--------|------|--------|------|---------|------|---------|------|
|                                                       |                                                     | F2     | S/NS | F2     | S/NS | F2     | S/NS | F2     | S/NS | F2      | S/NS | F2      | S/NS |
| Control:<br>Original borosilicate glass packaging, RT | PTFE insert, PTFE cap, RT                           | 64.6   | S    | 69.4   | S    | 84.6   | S    | 86.6   | S    | 87.6    | S    | 52.4    | S    |
|                                                       | Glass insert, PTFE cap, RT                          | 46.9   | NS   | 59.8   | S    | 66.1   | S    | 69.5   | S    | 85.8    | S    | 58.7    | S    |
|                                                       | PTFE insert, PTFE cap, 4°C                          | 68.5   | S    | 76.1   | S    | 67.4   | S    | 68.9   | S    | 80.1    | S    | 58.6    | S    |
|                                                       | Glass insert, PTFE cap, 4°C                         | 53.2   | S    | 59.6   | S    | 75.6   | S    | 85.0   | S    | 73.5    | S    | 62.9    | S    |
|                                                       | PTFE insert, PTFE cap, 35°C                         | 62.3   | S    | 78.2   | S    | 71.1   | S    | 95.1   | S    | 64.8    | S    | 61.8    | S    |
|                                                       | Glass insert, PTFE cap, 35°C                        | 46.7   | NS   | 71.4   | S    | 64.1   | S    | 82.2   | S    | 58.1    | S    | 26.4    | NS   |
|                                                       | PTFE insert, PE cap, 35°C                           | 77.4   | S    | 82.3   | S    | 44.3   | NS   | 46.3   | NS   | 45.0    | NS   | 30.2    | NS   |
|                                                       | PTFE insert, PTFE cap, 35°C, N <sub>2</sub> packed  | 58.8   | S    | 78.7   | S    | 65.1   | S    | 75.7   | S    | 84.2    | S    | 37.1    | NS   |
|                                                       | Glass insert, PTFE cap, 35°C, N <sub>2</sub> packed | 55.0   | S    | 61.2   | S    | 75.8   | S    | 62.0   | S    | 77.1    | S    | 31.1    | NS   |
|                                                       | PTFE insert, PTFE cap, -20°C                        |        |      |        |      | 60.1   | S    |        |      |         |      |         |      |
|                                                       | PTFE insert, PTFE cap, 0.3 mg NitroStat, RWC        |        |      |        |      |        |      |        |      |         |      | 56.0    | S    |
|                                                       | PTFE insert, PTFE cap, 0.6 mg NitroStat, RWC        |        |      |        |      |        |      |        |      |         |      | 49.9    | NS   |

Glass = borosilicate glass, F2 = similarity factor, S/NS = similar/ not similar, PTFE = polytetrafluoroethylene, PE = Polyethelene, N<sub>2</sub> = nitrogen gas packed, RT = room temperature, RWC = real world conditions. Red letters indicate results for the marketed product components and configuration of SMHeartCard®. N = 6 mean ± SEM. F2 values over 50 indicate statistical similarity.

1  
2  
3  
4  
5  
6  
7  
8  
9  
10  
11  
12  
13  
14  
15  
16  
17  
18  
19  
20  
21  
22  
23  
24  
25  
26  
27  
28  
29  
30  
31  
32  
33  
34  
35  
36  
37  
38  
39  
40  
41  
42  
43

## FIGURES

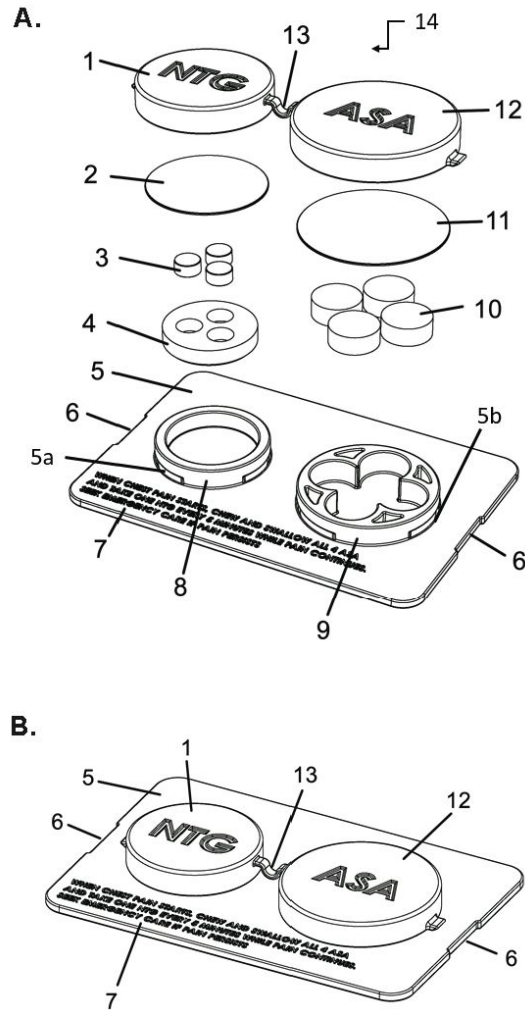

**Figure 1. Cardiac medication holder design.** Diagram of the disassembled (**A**), and assembled (**B**), cardiac medication holder demonstrating: 1) the nitroglycerin cap; 2) the NTG cap liner; 3) three NTG tablets; 4) the NTG insert; 5) the base; 6) grooves; 7) instructions; 8) the NTG insert holder; 9) the ASA well; 10) ASA tablets; 11) the ASA cap liner; 12) the ASA cap; 13) the cap bridge.

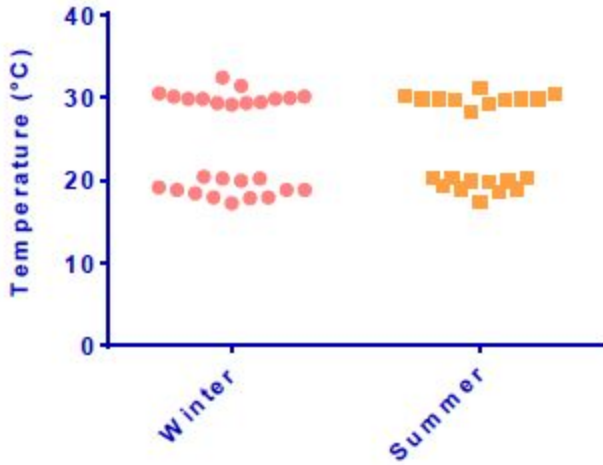

**Figure 2. Minimum and maximum 24hr pocket temperature excursions of four individuals measured using a ThermPro - TP50 Digital LCD Indoor Thermometer Hygrometer Humidity Meter in both summer and winter conditions.**

Confidential

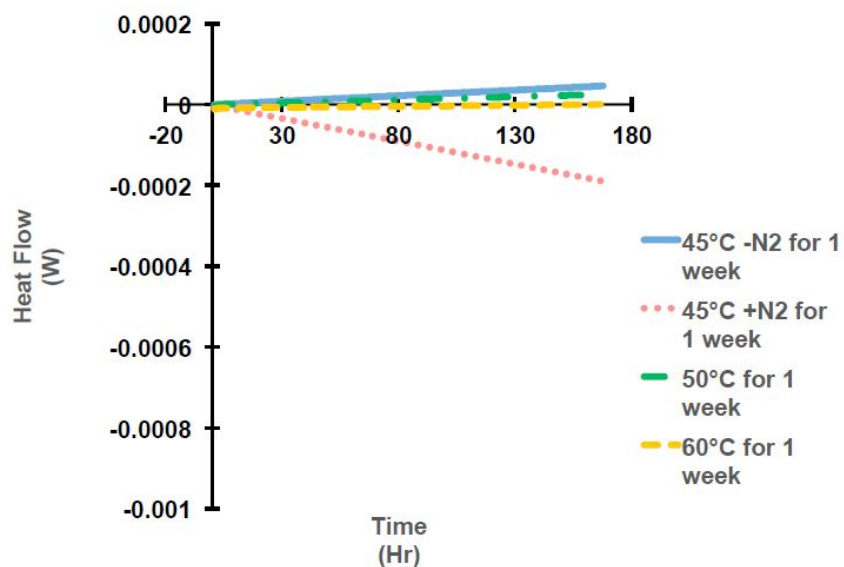

**Figure 3. Heat flow of 0.3mg Nitrostat® tablets stored for 1 week at high temperatures (45°C to 60°C) measured using a microcalorimeter. ±N2 = with/without nitrogen packaging.**

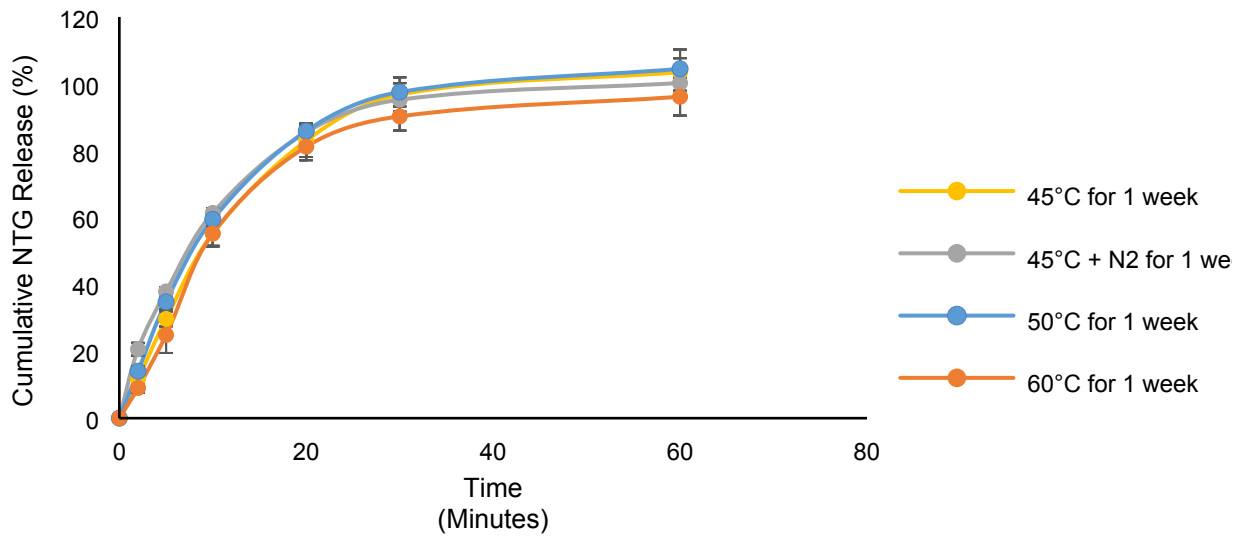

**Figure 4. Cumulative nitroglycerin release profiles of 0.3mg Nitrostat® tablets stored in a microcalorimeter at high temperatures (45°C to 60°C) for 1 week.  $\pm$ N2 = with/without N<sub>2</sub> packaging. N=6 mean  $\pm$  SEM.**



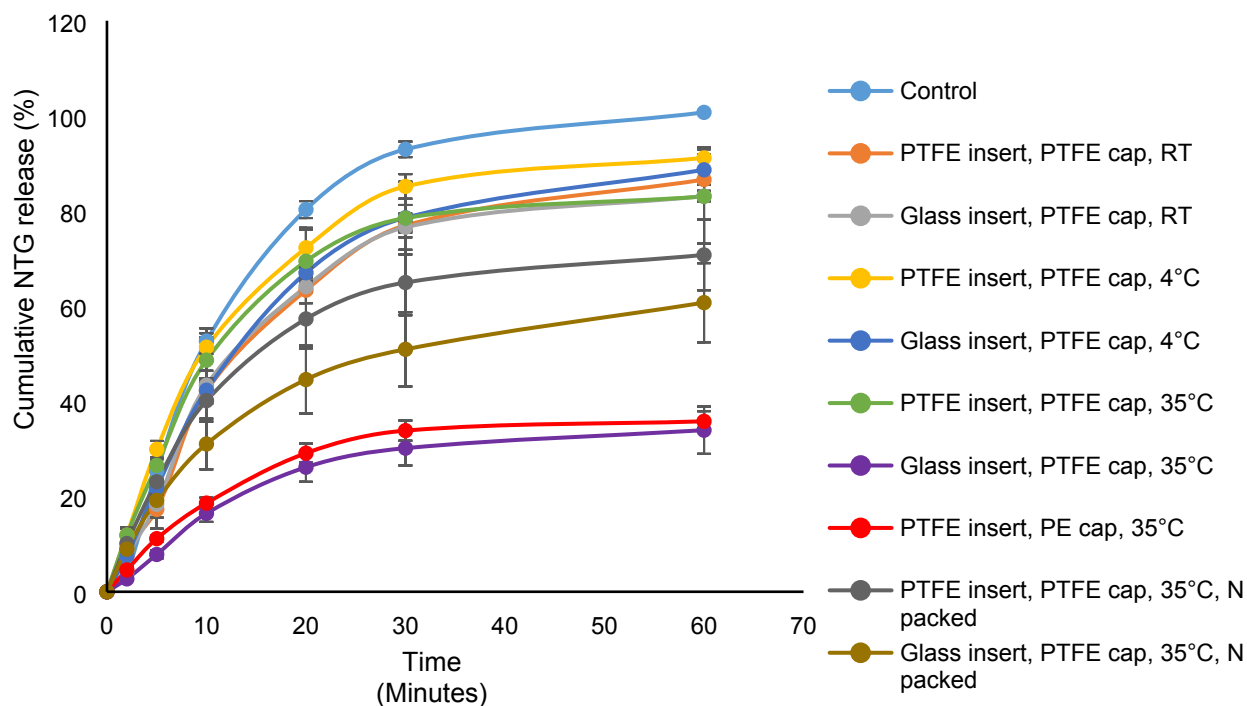

**Figure 5. Cumulative nitroglycerin release profiles of 0.3mg Nitrostat® tablets stored within in original borosilicate glass packaging (control, RT), or the cardiac medication holder enclosed with polytetrafluoroethylene (PTFE), polyethelene (PE), or glass at 4°C, RT (22°C), or 35°C, with or without N<sub>2</sub> packaging, for 24 weeks. N=6 mean ± SEM for each timepoint.**

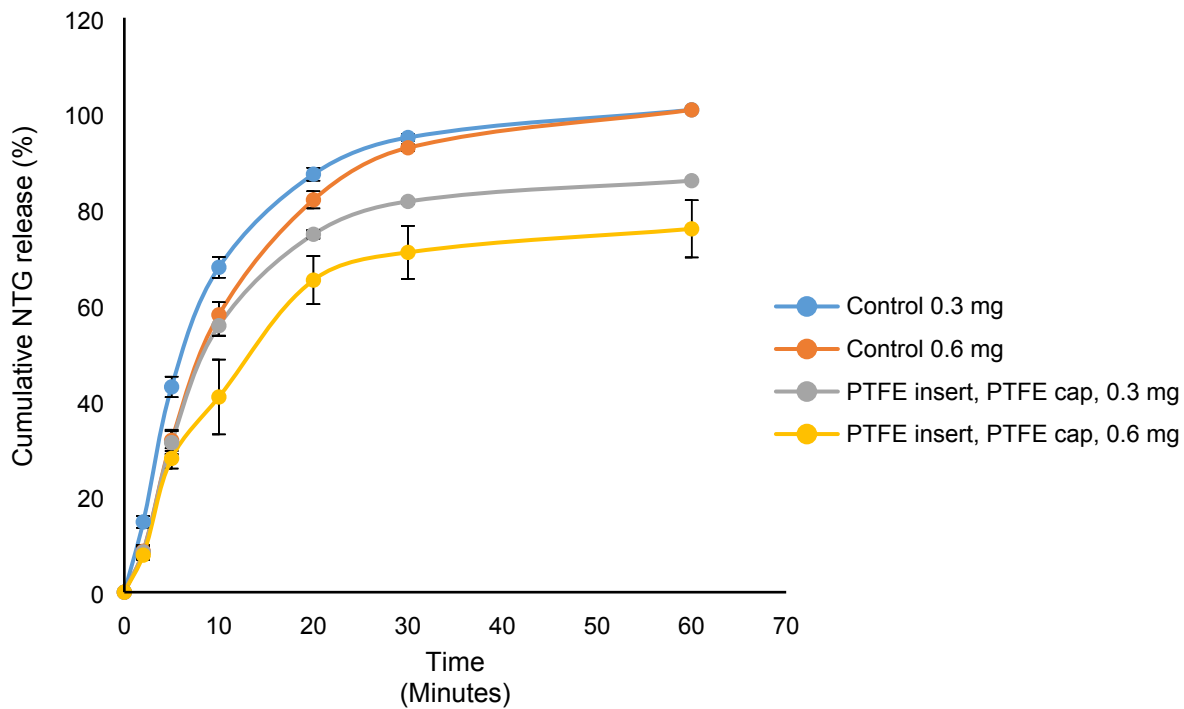

**Figure 6. Nitroglycerin release profiles of 0.3mg and 0.6mg Nitrostat® tablets stored at RT in original borosilicate glass packaging (controls), compared to 0.3mg and 0.6mg Nitrostat® tablets stored in the medication holder enclosed with polytetrafluoroethylene (PTFE) for 24 weeks under real world conditions. N=6 mean  $\pm$  SEM for each time point.**
